# Supplementary material for: Suicidal thoughts, suicidal behaviours and self-harm in daily life: A systematic review of ecological momentary assessment studies
Source: PubMed Central journal article supplement — Digit Health. 2020 Nov 3;6:2055207620963958. doi: 10.1177/2055207620963958 (PMC7649887; doi:10.1177/2055207620963958), 2020-11-03
Supplement: sj-pdf-1-dhj-10.1177_2055207620963958.pdf [file sj-pdf-1-dhj-10.1177_2055207620963958.pdf]

## Supplement 1. List of search terms used for systematic review

(\*) = wildcard

### Search terms for Ovid (PsycINFO):

#### Ecological Momentary Assessment

- “ecological momentary”
- “experience sampl\*”
- “ambulatory assessment\*”
- “context-aware experience\*”
- self-monitor
- self-regulat\*
- self-aware\*
- “daily task\*”
- “daily activity”
- “daily activities”
- “event-contingent\*”
- “signal-contingent\*”
- diary

#### Suicide and Self-harm

- "suicid\*"

- "self?injur\*"
- "NSSI"
- "parasuicide"
- "self?destruct\*"
- "self?harm"
- "selfharm"
- "DSH"
- "self?mutilat\*"
- "automutilat\*"
- "self?inflict\*"
- "self?immolat\*"
- "self?poison\*"
- "overdose\*"
- "cutt\*"

Search terms for Ovid (Pubmed):

#### Ecological Momentary Assessment

- (ecological AND momentary\*)
- experience sampl\*
- ambulatory assessment\*

- (context-aware AND experience\*)
- \*diary\*
- self-monitor
- self-regulat\*
- self-aware\*
- "daily activity"
- "daily activities"
- "daily life"
- "event-contingent\*"
- "signal-contingent\*"

#### Suicide and Self-harm

- suicid\*
- self injur\*
- NSSI
- parasuicide
- self destruct\*
- "self harm"
- selfharm
- DSH

- self mutilat\*
- automutilat\*
- self inflict\*
- self immolat\*
- self poison\*
- overdose\*
- cutt\*
